# Supplementary material for: Experimental Resonances in Viscoelastic Microfluidics
Source: Frontiers journal article supplement (doi:10.3389/fphy.2021.636070), 2021-06-01
Supplement: Presentation_1.PDF [file Presentation_1.PDF]

## Supplementary Material

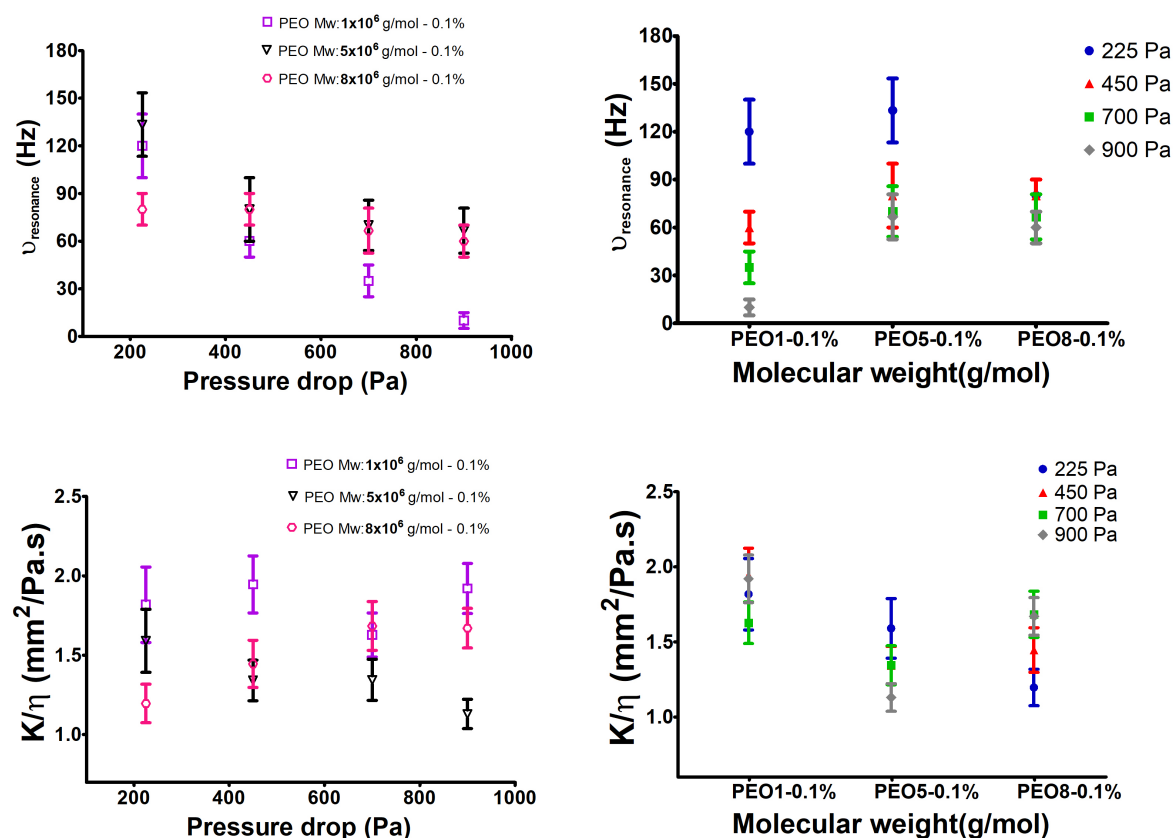

**Figure S1.** Resonance frequency (top panels) and magnitude of the dynamic permeability (bottom panels) as a function of the pressure drop, and molecular weight.

As the pressure drop increases, the resonance frequency decreases, and this effect is more pronounced for low molecular weights. See top panels of Fig. S1. For the dynamic permeability at resonance, there is not a clear tendency with pressure drop, since at some molecular weights it slightly decreases and at others it slightly increases. See bottom panels of Fig. S1.
